# Supplementary material
Source: PubMed Central journal article supplement (PMC8246331)
Supplement: jamapediatr-e212659-s002.pdf [file jamapediatr-e212659-s002.pdf]

1           **Is Carbon Dioxide Content Under Nose-Mouth Covering**  
2 **in Children Without Potential Risks? A Measurement Study**  
3 **in Healthy Children**

4  
5                           **Protocol - English Version 1.0, 6.4.2021**  
6

7                           **Harald Walach (1,2,3), Ronald Weigl (4), Stefan Hockertz (5),**  
8 **Andreas Diemer (6), Helmut Traindl (7), Anna Kappes (8), Juliane**  
9 **Prentice**  
10

- 11
- 12           1           Poznan University of the Medical Sciences, Pediatric Clinic, Poznan, Polen  
13           2           Witten/Herdecke University, Dept. of Psychology, Witten, Deutschland  
14           3           Change Health Science Institute, Berlin, Deutschland  
15           4           Kinderarztpraxis, Passau, Deutschland  
16           5           tpi consult, Bollschweil, Deutschland  
17           6           Allgemeinmedizin, Gernsbach, Deutschland  
18           7           Traindl-consult, Wien, Österreich  
19           8           Anna Kappes, Müllheim, Deutschland  
20           9           Juliane Prentice,

21  
22  
23           Address for Correspondence:

24  
25           Prof. Harald Walach  
26           Schönwalder Str. 17  
27           D - 13347 Berlin  
28           +49 30 467 97 436  
29           [harald.walach@uni-wh.de](mailto:harald.walach@uni-wh.de)  
30

31  
32  
33  
34  
35  
36  
37  
38  
39  
40  
41  
42  
43  
44  
45  
46  
47  
48  
49  
50  
51  
52  
53  
54  
55  
56  
57  
58  
59  
60  
61  
62  
63  
64  
65  
66  
67  
68  
69  
70  
71  
72  
73  
74  
75

## Abstract

Children and parents report problems when wearing nose-mouth covering (face masks, NMC). Little is known how much carbon dioxide is accumulating under such masks, or, rather, how well gas exchange works. First results from other groups point to the fact that carbon dioxide accumulates and might reach dimensions that are beyond safety norms. If this should be substantiated, especially in children, there would have to be a new weighing of health and safety concerns in children and protection against infection. This is why we want to conduct a controlled measurement study in children.

40-50 healthy children volunteers will be measured by a specialist engineer with their parents present and under supervision of medical and psychotherapeutic personnel. The protocol will last approximately 25 minutes per child, about 15 minutes with NMC and 10 minutes without. Another 15 minutes will be taken for additional measurements (breathing, temperature, blood oxygenation). All measurements are completely non-invasive. We will measure oxygen and carbon-dioxide content of breathed air and blood oxygenation, as well as facial temperature after wearing a mask. By comparing oxygen and carbon dioxide content with two different types of masks and without any we can see, whether the carbon dioxide content is above norm values under NMC.

## Background

Since the WHO has alarmed the world to the SARS-CoV2 pandemic in March 2020 most governments try to stop the spread of the novel corona virus. The governments of Germany and Austria, and possibly in other countries as well, have begun to make the wearing of nose and mouth covering (NMC), or face masks, compulsory even for children going to school. The evidence base for such a procedure to prevent infection is mixed at best. Two recent systematic reviews reach the conclusion that wearing face masks does not prevent infections by influenza virus, which is very similar to SARS-CoV2<sup>1,7</sup>. Ines Kappstein, a well known German hygiene specialist, pointed out that there are only very few data that support the wearing of NMC in general contexts, and practically none for children<sup>8</sup>. Perhaps wearing NMC is popular, because in Hong Kong and Taiwan it was possible to stem the infection rapidly and here 98% of the population was wearing NMCs in public<sup>9</sup>. A review of non-randomized studies concludes that a small benefit cannot be excluded<sup>10</sup>. However, the first pragmatic randomized study comparing the suggestion to wear NMC in public with no recommendation found that the effect is small and not significant<sup>11</sup>: of 6.000 participants 42 or 1.8% were infected in the experimental group, and 53 or 2.1% in the control group. When comparing those that actually did wear the masks the effect was even smaller. Positive effects of prevention of infection are likely small.

Against this background of a small protective benefit the question whether NMC increases carbon dioxide in breathed air substantially is getting more important. The first large scale German survey in parents and children, the Co-Ki-study of the University Witten/Herdecke using data of 25.930 children has shown that children report side effects to a high percentage<sup>4</sup>: 68% of parents report that their children have problems. Most frequently they report irritation, tension and stress (60% of parents), headaches (53%), difficulties

76 concentrating (50%), fatigue and sleepiness (30%). It is possible that a high content of carbon  
 77 dioxide in breathed air might be the reason.

78 The normal content of carbon dioxide in breathed air in the open is about 0.04 volume  
 79 % (i.e. 400 parts per million/ppm). 0.2 vol% or 2.000 ppm are acceptable for closed rooms  
 80 according to the German federal environmental office. This is at the same time the cut off for  
 81 children and pregnant women, which is considered safe. Maximum concentration at the  
 82 working place for healthy adults during 8 hours of work and 40 hours per week is considered  
 83 0.5 vol% or 5.000 ppm.

84 To the best of our knowledge there are no solid peer-reviewed data on carbon dioxide  
 85 concentration in breathed air under NMC, especially for children. Ing. Dr. Traindl, coauthor of  
 86 this study, has made some pilot measurements in 3 persons and found 3-5% CO<sub>2</sub> in breathed  
 87 air under NMC (30.000 - 50.000 ppm). One of these volunteers was a child, and here CO<sub>2</sub>-  
 88 concentrations were steadily measured at 3,4-5% (34.000-50.000 ppm)<sup>12</sup>. A team from South-  
 89 Tyrol conducted measurements in November 2020 in 24 volunteers using different types of  
 90 NMC and clarified discrepancies to a study that had been conducted by the official government  
 91 of the autonomic region in Bolzano<sup>13</sup>. Those results reported by Ing. Oberrauch are  
 92 considerably higher than those reported by the government. This is obviously due to the fact,  
 93 that the governmental working group of the region of Bolzano had subtracted the  
 94 environmentally measured carbon dioxide values from measures, which led to an artificially  
 95 lowered result. The data of the South Tyrolian study<sup>13</sup> regarding different types of NMC are  
 96 reported in Table 1,

97 Table 1 - Results of the study by the Group of Oberrauch in South Tyrol and those of the  
 98 official governmental study

|               | Oberrauch                 | Province of Bolzano      |
|---------------|---------------------------|--------------------------|
| No mask       | 3.143 ppm (2.000-5.000)   | 590 ppm (50-2.250)       |
| FFP2-N95      | 11.000 ppm (7.000-15.000) | 3.850 ppm (1.220-8.080)  |
| cloth         | 11.500 ppm (5.000-24.000) | 4.590 ppm (1.480-10.280) |
| Surgical mask | 7.292 ppm (5.000-13.000)  | 3.350 ppm (950-5.320)    |

99

100 It is obvious that the results found in 24 volunteers and the official data diverge widely,  
 101 with the data by Oberrauch and his group being beyond acceptable values<sup>13</sup>. Should these  
 102 results be replicated in children this would have to lead to immediate discussions with official  
 103 decision makers.

104 This is the reason why we want to measure in a well-controlled, experimental study in  
 105 volunteer children carbon dioxide and oxygen content in breathed air with and without  
 106 different types of NMC to find out whether raised values are found under different conditions.

107 .

108

109

110

## Method

111

### Target Group

112

113

114 Participants will be children in school age, whose parents have shown interest in the  
115 study. The children will be healthy, free from infections or neurological diseases, have no  
116 psychological disorders that would produce problems during 15 minutes of wearing a face mask  
117 and have no medically indicated exception from the compulsory NMC order.

118 Participation is strictly on a volunteer basis and no remuneration is presented. As a  
119 gratification parents will receive privileged information about the results before publication.

120 Children will be accompanied at all times by their parents, should they so wish. Older  
121 children beyond age 14 can also come on their own if they wish. In all cases the informed  
122 consent of their parents will have to be given. An informed consent and information leaflet for  
123 children will also explain that they can always withdraw without giving any reason

124

## 125 Aims

126

127 We want to measure in a short-term experimental protocol how the  $\text{CO}_2/\text{O}_2$ -  
128 concentration in breathed air under NMC and in the facial area without NMC will develop.  
129 We also want to measure the  $\text{CO}_2/\text{O}_2$ -concentration in inhaled and exhaled air without NMC.

130 Simultaneously, we will measure blood oxygenation, heart rate and breathing frequency  
131 to figure out, which physiological consequences the wearing of NMC will have. We will  
132 compare different materials - FFP2 masks and surgical masks - and thereby estimate the  
133 porousness of different materials. Data like the ambient air, age, size, breathing frequency of the  
134 children, volume of the masks will be documented.

135 We will measure the following data:

- 136 • Age, gender, size and weight of children.
- 137 • Type of NMC normally worn.
- 138 •  $\text{CO}_2/\text{O}_2$ -concentration in facial vicinity without NMC. The mix of inhaled and  
139 exhaled air will be considered
- 140 •  $\text{CO}_2/\text{O}_2$ -concentration in the volume of different types of masks while wearing  
141 them (surgical mask and FFP2) and in the inhaled and exhaled air
- 142 • Pressure minima and maxima in near-facial areas before and during the  
143 measurement, i.e. with and without MNC
- 144 • Breathing frequency before, during and after wearing of NMC
- 145 • Blood oxygenation before, during and after wearing of NMC
- 146 • Pulse frequency before, during and after wearing of NMC
- 147 • Thorax widening with and without NMC
- 148 • Facial surface temperature before, during and after wearing of NMC
- 149 • Volume of the different types of NMC
- 150 • Air diffusion of children's normally worn masks in comparison with certified  
151 masks
- 152 • Air parameters in the measurement room (temperature, humidity,  $\text{CO}_2$  content  
153 at the beginning and at the end of the measurements

154

155

156 **Measurement Protocol:**  
157

158 All measurements are non-invasive, using probes that are attached to the face of the  
159 child; thus, they will neither enter the nose nor the mouth. Blood oxygenation and temperature  
160 will be measured non-invasively using optical means and infra-red measurements (see table 2).

161 Time per child:  
162 Ca. 30 minutes for air measurements and 15 minutes for additional measurements.

163 1. Sociodemographic data of the child:  
164 Age, gender, height, weight

165 2. Description of the NMC normally worn  
166

167 3. Measurement and documentation of ambient air:

- 168 • CO<sub>2</sub>-concentration (ppm)
- 169 • Temperature
- 170 • Humidity

171 Apparatus: PCE-CMM 10 (producer: PCE)

- 172 • CO<sub>2</sub>: range 400ppm - 5.000ppm, steps 1ppm
- 173 • Humidity: 0 - 99%
- 174 • Temperature -10,0 °C - 50,0 °C, steps 0,1 °C

175 4. Temperature measurement (touch free) in facial area  
176 Measurement with IR-camera

177 Apparatus: IR-camera: testo 868 (producer: Testo GmbH)

- 178 • IR-resolution 160 x 120 Pixel
- 179 • range: - 30 °C - + 100 °C, precision: + 2 °C, + 2% of measured value

180 IR-temperature measurement testo 830 (producer: Testo GmbH)

- 181 • Range: - 30 °C - + 400 °C, precision: + 1,5 °C, + 1,5% of measured value
- 182 • resolution: 0,1 °C

183  
184 5. CO<sub>2</sub>/O<sub>2</sub>-measurement in facial air with and without NMC  
185

186 Measurement point is between mouth and nose; measurement hose is fixed using a  
187 textile adhesive band that is adapted to the head size.

188 A small part of the breathing air will be taken by an integrated pump

189 (flow 0,1 l/Min.). The distance of the suction point from the face is about 0.5 cm.

190 Measurement of CO<sub>2</sub> and O<sub>2</sub> with gas measurement device. Documentation by display  
191 recording online on a laptop using data-tracing and saving of snapshots. Docuemtation  
192 intervals 15 seconds (written records) and 30 seconds (data-tracing).

193

194

195

196 Further measurements:

- 197 • Pressure measurement under MNC: measurement point between mouth and nose
- 198 (analogous to CO<sub>2</sub>/O<sub>2</sub>-measurements)
- 199 • An additional thin hose in parallel to the one for air content will allow the connection
- 200 with a low pressure manometer, which can measure pressure when breathing.
- 201 • O<sub>2</sub>-saturation in blood with finger-pulse oximeter
- 202 • The finger-pulse oximeter will be attached to one finger of the child and the blood
- 203 oxygenation measured before, during and after CO<sub>2</sub>/O<sub>2</sub>-measurements.
- 204 • Measurement of breathing frequency

205 Gas measurement apparatus: G100 (manufacturer: Geotech)

206 CO<sub>2</sub>: Range: 0 - 20 Vol.%, precision + 1 %

207 O<sub>2</sub>: Range: 0 - 100 Vol.%, Precision + 1 %

208 Low pressure manometer: G1107 (Manufacturer: GHM Messtechnik)

209 20,00 hPa - +20,0 hPa, Precision 0,01 hPa (= 1 Pa)

210 Finger-pulse oximeter: GT-300C203 (Manufacturer: Geratherm)

211 SpO<sub>2</sub>: Range: 70% - 99 %, resolution 1 %

212 Pulse frequency: Range 30 bpm - 235 bpm, resolution: 1 bpm

213 Breathing frequency: manually by counting.

214

- 215 Measurement in sequence:
- 216 - no MNC
  - 217 - surgical mask
  - 218 - FFP2 mask
  - 219 - no MNC

220 The first and last measurements (no MNC) are considered baseline, the two measurements with  
221 different MNCs are considered experimental and will be randomized. Randomization is  
222 stratified by age (below 12 and above 11 years).

223

224 „Block 1“ - „5a.“ Baseline before MNC measurements

225

226 5a1. CO<sub>2</sub>/O<sub>2</sub>-Measurements of breathed air. Measurement in facial area without MNC

227 (Baseline 1), inhaled and exhaled air combined

228 Duration: 2 (max. 3) minutes

229 5a2. CO<sub>2</sub>/O<sub>2</sub>-Measurements of breathed air. in facial area without MNC

230 (Baseline 1a), only inhaled air

231 Duration: 2 (max. 3) minutes

232 5a3. Measurement of thorax excursion without MNC

233 3-5 measurements, written documentation

234 5a4. Surface temperature: Measurement (without touchin) in facial area

235 Measurement with IR camera

236

237 „Block 2 and 3“ - „5b. and 5c.“ Experimental measurement 1 & 2 with surgical or FFP2  
238 mask in randomized sequence

- 239  
240 5b1 CO<sub>2</sub>/O<sub>2</sub>-measurements of air with MNC. Measurement in close facial area with  
241 experimental mask inhaled and exhaled air combined  
242 Measurement/documentation.  
243 Duration: 2 (max. 3) minutes
- 244 5b2 CO<sub>2</sub>/O<sub>2</sub>-measurements of breathed air. Measurement in close facial area with experimental  
245 mask  
246 Measurement/documentation of inhaled air.  
247 Duration: 2 (max. 3) minutes
- 248 5b3 CO<sub>2</sub>/O<sub>2</sub>-measurements of exhaled air. Measurement in close facial area with experimental  
249 mask  
250 Measurement/documentation of exhaled air  
251 Duration: 2 (max. 3) minutes
- 252  
253 5b4 Measurement of thorax excursion with experimental mask  
254 3-5 measurements, written documentaiton
- 255 5b5. Measurement of surface temperature (touch free) of facial area  
256 Measurement using IR-camera  
257  
258
- 259 „Block 4“ - „5d.“ Baseline after experimental measurements same as 5a  
260
- 261 All measurements are documented in writing during the experiment.  
262 At the end the CO<sub>2</sub>/O<sub>2</sub>-values and the time trace will be documented via data-tracing of the  
263 values displayed at the laptop. Sampling frequency: every 5 to 15 seconds.  
264  
265
- 266 6. Interval, no MNC  
267 duration: 5 minutes, free time
- 268 6a: Measurement of the breathability of the everyday MNC worn normally by the child during  
269 the interval by experimentators  
270
- 271 Apparatus: Own construction in line with norm EN 14683 (medical face masks, testing  
272 procedure), which is an air-passing measurement of the material using a  
273 negative pressure manometer. The mask is tightened over a measurement hose  
274 and air is sucked into the hose continuously with a volume of 100 l/hour.  
275 Depending on the breathability of the material there will be a steady state low-  
276 pressure in the hose. Continuous measurement of the steady-state low pressure  
277 with a fine manometer.  
278
- 279 Apparatus: GDH 200-07 (Manufacturer: GHM Messtechnik)

280 Range 0,00 - 19,99 hPa, resolution: 0,01 hPa (= 1 Pa)

281 We will calibrate the system with certified masks (surgical and FFP1/2) which will allow

282 to test the breathability of the material in comparison with the certified products.

283

284

285 Documentation: written documentation

286

287 6b: Measurement of the breathability of the certified surgical mask during the interval by

288 experimentator, apparatus like 6a.

289

290 7. Measurements after 5 minutes rest for child without MNC

291 • O<sub>2</sub>-saturation in blood using finger-pulse oximeter

292 Apparatus: point 5

293 8. Measurement and documentation of ambient air parameters:

294 • CO<sub>2</sub>-concentration (ppm)

295 • temperature

296 • humidity

297

298 Rooms will be ventilated after each measurement unit.

299

300 **Protocol**

301

302 First, measurements of ambient air parameters without MNC with child present will be

303 taken (3 minutes, baseline 1). Afterwards, measurements of conditions with masks (5x3

304 Minutes) will be performed. Measurements of breathed air without masks will be taken with

305 child present (3 Minutes, Baseline 2). After 5 minutes interval a post-measurement of

306 temperature und breathed air with child present will be taken without MNC.

307

308 Table 2 - Protocol Summary

| Baseline 1<br>Measurement<br>without MNC                                                                     | Measurements<br>with MNC1 & 2<br>randomized                                                                                  | Baseline 2<br>Measurement<br>without MNC                                                                                                 | Interval,<br>parallel<br>measurements                                                                                 | Post measurement                                                                                                                           |
|--------------------------------------------------------------------------------------------------------------|------------------------------------------------------------------------------------------------------------------------------|------------------------------------------------------------------------------------------------------------------------------------------|-----------------------------------------------------------------------------------------------------------------------|--------------------------------------------------------------------------------------------------------------------------------------------|
| 2x3 Minutes                                                                                                  | 5x3 Minutes                                                                                                                  | 2x3 Minutes                                                                                                                              | 5 Min.                                                                                                                | 3 Minutes                                                                                                                                  |
| Room:<br>CO <sub>2</sub> -<br>concentration<br>(ppm)<br>temperature<br>humidity<br><br>Child:<br>temperature | Child:<br>CO <sub>2</sub> -<br>concentration<br>(ppm) in<br>breathed air close<br>to face<br>Breathing<br>frequency<br>Blood | Child:<br>Temperature<br>CO <sub>2</sub> -<br>concentration<br>(ppm) in<br>breathed air close<br>to face Breathing<br>frequency<br>Blood | Child:<br>Interval<br><br><i>Additional<br/>mesaurements<br/>by<br/>experimentator.:</i><br>Breathability<br>of masks | Room:<br>CO <sub>2</sub> -concentration<br>(ppm)<br>temperature<br>humidity<br><br>Child:<br>temperature<br>CO <sub>2</sub> -concentration |



|                                                                                                                |             |             |  |                                                                              |
|----------------------------------------------------------------------------------------------------------------|-------------|-------------|--|------------------------------------------------------------------------------|
| CO <sub>2</sub> -<br>concentration<br>(ppm) in breathed<br>air close to face<br>Documentation<br>soc-dem. data | oxygenation | oxygenation |  | (ppm) in breathed<br>air close to face<br>Breathing<br>frequency &<br>volume |
|----------------------------------------------------------------------------------------------------------------|-------------|-------------|--|------------------------------------------------------------------------------|

309

310

311

312

### Controls and Quality Assurance

313 Blinding is considered unnecessary, as the measurements are objective. Measurements  
314 will be conducted exclusively with calibrated and producer-certified apparatuses. The measuring  
315 engineer has ample experience in using the apparatuses and has conducted a pilot study. Data  
316 will be documented immediately after measurements either by written documentation or data  
317 capture via the instruments used (data tracing, screen snap shots).

318 There will be two control measurements as a pre- and post-baseline. All apparatuses will  
319 be calibrated according to manufacturers' standards.

320 Measurements of breathed air under experimental masks (5b & 5c) will be randomized  
321 to exclude effects of sequences and randomization will be stratified by age of children (below  
322 and above age 10).

323 The experimental rooms will be ventilated sufficiently before the next child is measured.  
324 Hygiene rules will be followed according to regulations as long as they do not interfere with the  
325 measurement procedures. Personnel is tested to be free of SARS-CoV2.

326 The randomization will be conducted using randomizer.org. Two sets of random numbers  
327 will be prepared, for children up to 11 years of age and beyond. A coin toss will decide whether  
328 even or odd numbers will mean first surgical or first FFP2 masks. As the request will be for  
329 equal numbers of 2 conditions, there is no blocking or sequencing effect that will consequently  
330 completely blind the randomization sequence. Cards will be prepared with the sequence written  
331 on them and put in opaque sealed envelopes with running sequential numbers written onto  
332 them. This will preclude any tampering with the randomization sequence.

333

334

335

336

### Statistics - Power Analysis

#### Poweranalysis

337

338

339 There are no pilot data available, hence we will base our analysis on existing data. We  
340 assume that we will measure 3.000 ppm (or 0,3 vol%) CO<sub>2</sub> at baseline, i.e. a value which is  
341 slightly above current accepted norms, which is a conservative estimate. We assume further that  
342 good masks will produce values between 5.000 ppm and 12.000 ppm. The table of raw-data  
343 from <sup>13</sup> allows us to calculate as means for CO<sub>2</sub>-content of breathed air without masks 3.143  
344 ppm, with surgical mask of 7.292 ppm and with cloth masks a value of 11.500 ppm, as well as a

345 standard deviation of 2.500 ppm for surgical masks, 5.300 ppm for cloth and 1.000 ppm for no  
346 masks.

347 This results in the following standardized mean differences (calculated with the larger  
348 SD for a conservative estimate):

349 Normal air vs. surgical masks:  $d = 1.6$

350 Normal air vs. Cloth masks :  $d = 1.6$

351 In order to secure such a strong effect with 90% power 7-9 children would be sufficient  
352 per comparison, i.e. 18 children. As we will also measure other parameters, such as breathing  
353 frequency and blood oxygenation, we will use a safety factor of 2, which will require about 40  
354 complete data sets.

355 We will stratify children into age groups up to 11 and beyond and want to recruit  
356 approximately similar numbers into each stratum.

357

### 358 **Handling of Missing Data:**

359

360 We expect few missing data, as automated measurements and immediate minuting will  
361 reduce measurement glitches. Therefore, only complete data-sets will be taken into the analysis.  
362 Should a data-set be incomplete in respect to one variable (for instance temperature in one  
363 condition), then we will interpolate it with the mean for that group in this condition. A  
364 sensitivity analysis with a nearest neighbor algorithm will be calculated. The more conservative  
365 value will be used in all cases.

366

### 367 **Statistical Analysis**

368

369 The statistical analysis will utilize a linear model with a time-factor and type of mask as a  
370 grouping factor. This presupposes normal distribution, which will be checked visually and  
371 statistically (Shapiro-Wilk's test). Should normal distribution not be given, an appropriate  
372 model will be chosen, should log-transformation not result in normality.

373 As different cell-sizes might be present, a mixed model will be chosen. Age, gender,  
374 ambient carbon dioxide content will be used as covariates. Type of mask is a fixed factor, time is  
375 a random factor. For each dependent variable - CO<sub>2</sub>-concentration, blood oxygenation,  
376 breathing frequency - we will calculate a separate model. Although the variables will be  
377 correlated the logic of the study requires separate estimates.

378 This inferential statistical analysis allows to judge, whether CO<sub>2</sub>-content of inhaled air,  
379 blood oxygenation and breathing frequency are influenced by the wearing of MNC. It is silent  
380 about any clinical importance of the findings. Hence effect sizes as deviation of the empirical  
381 values from the norms published by the Federal Environmental Office will be calculated with  
382 the largest standard deviation as standardization factor. This means that a score of 1 sigma will  
383 be one standard deviation below or above the maximum norm score. Where such values are not  
384 available, they will be calculated as deviation from baseline without MNC.

385

386  
387

## **Ethics**

388           The study has been presented to and judged ethically sound by the ethics board of the  
389 University Witten/Herdecke. Recommendations have been incorporated into the present  
390 protocol.

391           In general, the load incurred by children by the current protocol seems to be low  
392 compared to what they have to do in normal school practice. They are required to wear NMC  
393 for the duration of 15 minutes, where they are normally required to wear it for several hours  
394 per day. Children will have a benefit by knowing about their individual carbon dioxide load  
395 under NMC, which might allow them or their parents to file for exceptional circumstances.  
396 Apart from that we will generate important knowledge that can be used for political action.  
397 This additional knowledge is central, as currently political decisions are made without the  
398 respective evidence base.

399           Children can stop the measurement at any time and/or withdraw from the study  
400 without giving any reasons and without consent of their parents.

401

402

## **Protocol, Publication**

403

404

405           The protocol will be made publicly available and results published regardless of findings.  
406 As soon as possible results will be made available on a pre-print server and the manuscript  
407 submitted to peer review.

408

409

## **Sponsoring**

410

411

412           This is an investigator initiated study. There is no external sponsoring, and all members  
413 of the study team work free of charge. MWFD e.V. is organizing this study and covering  
414 essential expenses only.

415

416

417

418 OSF Link:  
419 [https://osf.io/yh97a/?view\\_only=df003592db5c4bd1ab183dad8a71834f](https://osf.io/yh97a/?view_only=df003592db5c4bd1ab183dad8a71834f)

420

421

422

423

## References

- 424 1. Jefferson T, Jones M, Al Ansari LA, Bawazeer G, Beller E, Clark J, et al. Physical  
425 interventions to interrupt or reduce the spread of respiratory viruses. Part 1 - Face masks, eye  
426 protection and person distancing: systematic review and meta-analysis. medRxiv.  
427 2020:2020.03.30.20047217. doi: 10.1101/2020.03.30.20047217.
- 428 2. Xiao J, Shiu EYC, Gao H, Wong JY, Fong MW, Ryu S, et al. Nonpharmaceutical  
429 measures for pandemic influenza in nonhealthcare settings - personal protective and  
430 environmental measures. *Emerging Infectious Diseases*. 2020;26(5):967-75. doi:  
431 10.3201/eid2605.190994.
- 432 3. Kappstein I. Mund-Nasen-Schutz in der Öffentlichkeit: Keine Hinweise für eine  
433 Wirksamkeit. *Krankenhaushygiene up2date*. 2020;15(03):279-97. doi: 10.1055/a-1174-6591.
- 434 4. Cowling BJ, Ali ST, Ng TWY, Tsang TK, Li JCM, Fong MW, et al. Impact assessment  
435 of non-pharmaceutical interventions against coronavirus disease 2019 and influenza in Hong  
436 Kong: an observational study. *The Lancet Public Health*. 2020. doi: 10.1016/S2468-  
437 2667(20)30090-6.
- 438 5. Schrappe M, Francois-Kettner H, Gruhl M, Hart DJ, Knieps F, Manow P, et al.  
439 Thesenpapier 4.0: Die Pandemie durch SARS-CoV-2/Covid-19 - der Übergang zur chronischen  
440 Phase - Verbesserung der Outcomes in Sicht - Stabile Kontrolle: Würde und Humanität wahren  
441 - Diskursverengung vermeiden: Corona nicht politisieren. Köln: [www.matthias.schrappe.com](http://www.matthias.schrappe.com),  
442 2020.
- 443 6. Bundgaard H, Bundgaard JS, Raaschou-Pedersen DET, von Buchwald C, Todsén T,  
444 Norsk JB, et al. Effectiveness of Adding a Mask Recommendation to Other Public Health  
445 Measures to Prevent SARS-CoV-2 Infection in Danish Mask Wearers. *Annals of Internal  
446 Medicine*. 2020. doi: 10.7326/M20-6817.
- 447 7. Schwarz S, Jenetzky E, Krafft H, Maurer T, Martin D. Corona children studies "Co-Ki":  
448 First results of a Germany-wide registry on mouth and nose covering (mask) in children.  
449 *Research Square Preprint*. 2021. doi: 10.21203/rs.3.rs-124394/v1.
- 450 8. Traindl H. Kohlendioxid-Measurements der Luft unter MNS-Masken [Carbon dioxide  
451 measurement of air under standard mouth-nose protection masks]. Vienna: Traindl-consult,  
452 2020 Contract No.: Project Number 303. [https://www.afa-  
453 zone.at/?smd\\_process\\_download=1&download\\_id=2672](https://www.afa-zone.at/?smd_process_download=1&download_id=2672)
- 454 9. Oberrauch B, Adami M, Gutweniger U, Galli E, Dellasega V, Müller H, et al. Ist der  
455 Gebrauch von Mund-Nasen-Bedeckungen in der Gesamtbevölkerung eher schädlich als  
456 nützlich unter Berücksichtigung der CO<sub>2</sub> Konzentration? Luftqualität während des Tragens von  
457 Mund-Nasen-Bedeckungen mit Mini-Review [Does the use of a mask covering mouth and nose  
458 confer benefit or harm on the population: Air quality while wearing a nose-mouth coverage and  
459 mini-review]. Bolzano: 2020. [https://2020news.de/wp-content/uploads/2020/12/DT\\_Unabha%CC%88ngige-  
460 Studie\\_zur\\_Mund-Nasen-Bedeckung-1.pdf](https://2020news.de/wp-content/uploads/2020/12/DT_Unabha%CC%88ngige-Studie_zur_Mund-Nasen-Bedeckung-1.pdf)

461

462

463
