# Supplementary material
Source: PubMed Central journal article supplement (PMC8246331)
Supplement: jamapediatr-e212659-s003.pdf [file jamapediatr-e212659-s003.pdf]

Walach. Experimental assessment of carbon dioxide content in inhaled air with or without face masks in healthy children. *JAMA Pediatr*. Published online June 30, 2021. doi:10.1001/jamapediatrics.2021.2659

**Data Sharing Statement**

**Data available:** Yes

**How to access data:** Data will be provided publicly at [https://osf.io/yh97a/?view\\_only=df003592db5c4bd1ab183dad8a71834f](https://osf.io/yh97a/?view_only=df003592db5c4bd1ab183dad8a71834f).

**When available:** Now
